# Supplementary material for: Development of a standardized adsorbable organofluorine screening method for wastewaters with detection by combustion ion chromatography
Source: Royal Society of Chemistry journal article supplement (doi:10.1039/d2ay01121b), 2022-01-01
Supplement: d2ay01121b1.pdf [file d2ay01121b1.pdf]

Supplemental:

**Table S1. Acronyms, chemical names, chemical abstract services registry number (CASRN) and chemical formulas for organofluorine compounds listed in order of increasing number of carbons.**

| Acronym         | Chemical name                                                                                                                   | CASRN       | Formula                                                                         |
|-----------------|---------------------------------------------------------------------------------------------------------------------------------|-------------|---------------------------------------------------------------------------------|
| PFBA            | perfluoro-n-butanoic acid                                                                                                       | 375-22-4    | C <sub>4</sub> HF <sub>7</sub> O <sub>2</sub>                                   |
| PF4OPeA         | perfluoro-4-oxapentanoic acid                                                                                                   | 377-73-1    | C <sub>4</sub> HF <sub>7</sub> O <sub>3</sub>                                   |
| FBSA-I          | perfluoro-1-butanefulfonamide                                                                                                   | 30334-69-1  | C <sub>4</sub> H <sub>2</sub> F <sub>9</sub> NO <sub>2</sub> S                  |
| PFBS            | potassium perfluoro-1-butanefulfonate                                                                                           | 29420-49-3  | C <sub>4</sub> F <sub>9</sub> KO <sub>3</sub> S                                 |
| PFEESA          | potassium perfluoro(2-ethoxyethane)sulfonate                                                                                    | 117205-07-9 | C <sub>4</sub> F <sub>9</sub> SO <sub>4</sub> K                                 |
| PFPeA           | perfluoro-n-pentanoic acid                                                                                                      | 2706-90-3   | C <sub>5</sub> HF <sub>9</sub> O <sub>2</sub>                                   |
| PF5OHxA         | perfluoro-5-oxahexanoic acid                                                                                                    | 863090-89-5 | C <sub>5</sub> HF <sub>9</sub> O <sub>3</sub>                                   |
| 3,6-OPFHpA      | perfluoro-3,6-dioxaheptanoic acid                                                                                               | 151772-58-6 | C <sub>5</sub> HF <sub>9</sub> O <sub>4</sub>                                   |
| FBET            | 2-perfluorobutyl ethanol                                                                                                        | 2043-47-2   | C <sub>6</sub> H <sub>5</sub> F <sub>9</sub> O                                  |
| HFPO-DA         | 2,3,3,3-tetrafluoro-2-(1,1,2,2,3,3,3-heptafluoropropoxy)-propanoic acid                                                         | 13252-13-6  | C <sub>6</sub> HF <sub>11</sub> O <sub>3</sub>                                  |
| 4:2 FTS         | sodium 1H,1H,2H,2H-perfluorohexanesulfonate                                                                                     | 27619-93-8  | C <sub>6</sub> H <sub>4</sub> F <sub>9</sub> SO <sub>3</sub> Na                 |
| PFHxS           | potassium perfluoro-1-hexanesulfonate                                                                                           | 3871-99-6   | C <sub>6</sub> F <sub>13</sub> KO <sub>3</sub> S                                |
| PFHxPA          | perfluorohexylphosphonic acid                                                                                                   | 40143-76-8  | C <sub>6</sub> H <sub>2</sub> F <sub>13</sub> PO <sub>3</sub>                   |
| FHUEA           | 2H-perfluoro-2-octenoic acid                                                                                                    | 70887-88-6  | C <sub>8</sub> H <sub>2</sub> F <sub>12</sub> O <sub>2</sub>                    |
| FHEA            | 2-perfluorohexyl ethanoic acid                                                                                                  | 53826-12-3  | C <sub>8</sub> H <sub>3</sub> F <sub>13</sub> O <sub>2</sub>                    |
| PFOA            | perfluoro-n-ctanoic acid                                                                                                        | 335-67-1    | C <sub>8</sub> HF <sub>15</sub> O <sub>2</sub>                                  |
| 6:2 PAP         | sodium 1H,1H,2H,2H-perfluorooctylphosphonate                                                                                    | NA          | C <sub>8</sub> H <sub>4</sub> F <sub>13</sub> O <sub>4</sub> PNa <sub>2</sub>   |
| PFOS            | potassium perfluoro-1-octanesulfonate                                                                                           | 2795-39-3   | C <sub>8</sub> F <sub>17</sub> KO <sub>3</sub> S                                |
| 9Cl-PF3ONS      | potassium 9-chlorohexadecafluoro-3-oxanonane-1-sulfonate                                                                        | 73606-19-6  | C <sub>8</sub> F <sub>16</sub> ClSO <sub>4</sub> K                              |
| PFDA            | perfluoro-n-decanoic acid                                                                                                       | 335-76-2    | C <sub>10</sub> HF <sub>19</sub> O <sub>2</sub>                                 |
| FOSAA           | perfluoro-1-octanesulfonamidoacetic acid                                                                                        | 2806-24-8   | C <sub>10</sub> H <sub>4</sub> F <sub>17</sub> NO <sub>4</sub> S                |
| PFDDPA          | perfluorodecylphosphonic acid                                                                                                   | 52299-26-0  | C <sub>10</sub> H <sub>2</sub> F <sub>21</sub> PO <sub>3</sub>                  |
| 11Cl-PF3OUdS    | potassium 11-chloroeicosalfluoro-3-oxaundecane-1-sulfonate                                                                      | 83329-89-9  | C <sub>10</sub> F <sub>20</sub> ClSO <sub>4</sub> K                             |
| N-AP-FHxSA      | N-(3-dimethylaminopropan-1-yl)perfluoro-1-hexanesulfonamide                                                                     | 50598-28-2  | C <sub>11</sub> H <sub>13</sub> F <sub>13</sub> N <sub>2</sub> O <sub>2</sub> S |
| N-MeFOSE        | 2-(N-methylperfluoro-1-octanesulfonamido)-ethanol                                                                               | 24448-09-7  | C <sub>11</sub> H <sub>8</sub> F <sub>17</sub> NO <sub>3</sub> S                |
| FDUEA           | 2H-perfluoro-2-dodecenoic acid                                                                                                  | 70887-94-4  | C <sub>12</sub> H <sub>2</sub> F <sub>20</sub> O <sub>2</sub>                   |
| FDET            | 2-perfluorodecyl ethanol                                                                                                        | 865-86-1    | C <sub>12</sub> H <sub>5</sub> F <sub>21</sub> O                                |
| N-EtFOSE-M      | 2-(N-ethylperfluoro-1-octanesulfonamido)-ethanol                                                                                | 1691-99-2   | C <sub>12</sub> H <sub>10</sub> F <sub>17</sub> NO <sub>3</sub> S               |
| FDEA            | 2-perfluorodecyl ethanoic acid                                                                                                  | 53826-13-4  | C <sub>12</sub> H <sub>3</sub> F <sub>21</sub> O <sub>2</sub>                   |
| N-TamP-FHxSA    | N-[3-(perfluoro-1-hexanesulfonamido)propan-1yl]-N,N,N-trimethylammonium                                                         | 38850-51-0  | C <sub>12</sub> H <sub>15</sub> F <sub>13</sub> N <sub>2</sub> O <sub>2</sub> S |
| 10:2 FTS        | sodium 1H,1H,2H,2H-perfluorododecane sulfonate                                                                                  | 108026-35-3 | C <sub>12</sub> H <sub>4</sub> F <sub>21</sub> SO <sub>3</sub> Na               |
| 6:6 PFPi        | sodium bis(perfluorohexyl)phosphonic acid                                                                                       | 70609-44-8  | C <sub>12</sub> F <sub>26</sub> PO <sub>2</sub> Na                              |
| Fluconazole     | 2-(2,4-Difluorophenyl)-1,3-bis(1H-1,2,4-triazol-1-yl)propan-2-ol                                                                | 86386-73-4  | C <sub>13</sub> H <sub>12</sub> F <sub>2</sub> N <sub>6</sub> O                 |
| Trifluralin     | 2,6-Dinitro-N,N-dipropyl-4-(trifluoromethyl)aniline                                                                             | 1582-09-8   | C <sub>13</sub> H <sub>16</sub> F <sub>3</sub> N <sub>3</sub> O <sub>4</sub>    |
| PFTeDA          | Perfluoro-n-tetradecanoic acid                                                                                                  | 376-06-7    | C <sub>14</sub> HF <sub>27</sub> O <sub>2</sub>                                 |
| N-CMAmp-6:2FOSA | N-(carboxymethyl)-N,N-dimethyl-N-[3-(1H,1H,2H,2H-perfluoro-1-octanesulfonamido)propan-1-yl]ammonium                             | 34455-29-3  | C <sub>15</sub> H <sub>19</sub> F <sub>13</sub> N <sub>2</sub> O <sub>4</sub> S |
| Oxyfluorfen     | 2-Chloro-1-(3-ethoxy-4-nitrophenoxy)-4-(trifluoromethyl)benzene                                                                 | 42874-03-3  | C <sub>15</sub> H <sub>11</sub> ClF <sub>3</sub> NO <sub>4</sub>                |
| Atorvastatin    | Calcium bis{(3R,5R)-7-[2-(4-fluorophenyl)-3-phenyl-4-(phenylcarbamoyl)-5-(propan-2-yl)-1H-pyrrol-1-yl]-3,5-dihydroxyheptanoate} | 134523-03-8 | C <sub>66</sub> H <sub>68</sub> F <sub>2</sub> N <sub>4</sub> O <sub>10</sub>   |

**Table S2. LFB AOF-CIC recoveries and precision of PFAS using a) 1.0 g/L KNO<sub>3</sub> in the sample and GAC wash and b) 8.2 g/L KNO<sub>3</sub> in the GAC wash. TXA-04 adsorption unit used for all data. Chemicals listed in order of increasing number of carbons.**

| Chemical        | Spike Concentration<br>µg/L | 1.0 g/L KNO <sub>3</sub> in<br>Sample and GAC<br>Wash<br>LFB Recovery, % | RSD, % | Spike Concentration<br>µg/L | 8.2 g/L KNO <sub>3</sub> in<br>GAC Wash<br>LFB Recovery, % | RSD, % |
|-----------------|-----------------------------|--------------------------------------------------------------------------|--------|-----------------------------|------------------------------------------------------------|--------|
| PFBA            | 19.9                        | 72.2                                                                     | 3.2    | 9.9                         | 47.0                                                       | 0.068  |
| PF4OPeA         | 19.9                        | 106                                                                      | 2.2    | 10.1                        | 101                                                        | 2.2    |
| FBSA-I          | 20.0                        | 101                                                                      | 1.3    | 10.0                        | 94.9                                                       | 10     |
| PFBS            | 19.9                        | 98.1                                                                     | 1.2    | 9.9                         | 116                                                        | 11     |
| PFEESA          | 20.0                        | 92.6                                                                     | 13     | 10.1                        | 89.5                                                       | 1.0    |
| PFPeA           | 20.1                        | 94.2                                                                     | 0.78   | 10.0                        | 108                                                        | 0.70   |
| PF5OHxA         | 20.1                        | 108                                                                      | 2.3    | 10.1                        | 110                                                        | 0.72   |
| 3,6-OPFHpA      | 19.9                        | 108                                                                      | 2.1    | 10.1                        | 110                                                        | 5.3    |
| PFPeS           | 19.9                        | 99.5                                                                     | 3.0    | 7.0                         | 105                                                        | 7.8    |
| FBET            | 20.1                        | 85.3                                                                     | 8.5    | 10.0                        | 94.8                                                       | 3.9    |
| HFPO-DA         | 19.2                        | 100                                                                      | 1.4    | 10.1                        | 93.8                                                       | 1.9    |
| 4:2 FTS         | 19.8                        | 106                                                                      | 4.0    | 10.0                        | 106                                                        | 0.45   |
| PFHxS           | 20.0                        | 94.8                                                                     | 2.6    | 10.0                        | 102                                                        | 2.3    |
| PFHxPA          | 20.1                        | 104                                                                      | 12     | 9.9                         | 91.1                                                       | 11     |
| FHUEA           | 20.1                        | 105                                                                      | 1.3    | 20.1                        | 101                                                        | 2.2    |
| FHEA            | 20.0                        | 88.0                                                                     | 3.8    | 19.9                        | 99.5                                                       | 0.92   |
| PFOA            | 20.6                        | 89.2                                                                     | 3.1    | 10.3                        | 78.0                                                       | 5.6    |
| 6:2 PAP         | 20.0                        | 83.5                                                                     | 1.2    | 10.1                        | 81.3                                                       | 15     |
| PFOS            | 19.4                        | 72.2                                                                     | 2.1    | 10.2                        | 87.5                                                       | 3.3    |
| 9CI-PF3ONS      | 20.0                        | 56.2                                                                     | 6.9    | 10.1                        | 88.8                                                       | 7.2    |
| PFDA            | 21.1                        | 46.7                                                                     | 6.8    | 9.8                         | 82.6                                                       | 1.5    |
| FOSAA           | 20.0                        | 46.7                                                                     | 6.3    | 10.1                        | 82.6                                                       | 4.2    |
| PFDPA           | 19.9                        | 85.1                                                                     | 2.2    | 10.0                        | 99.1                                                       | 6.8    |
| 11CI-PF3OUdS    | 20.1                        | 35.9                                                                     | 10     | 9.9                         | 46.2                                                       | 21     |
| N-AP-FHxSA      | 19.9                        | 62.2                                                                     | 4.0    | 9.9                         | 46.3                                                       | 14     |
| N-MeFOSE        | 20.0                        | 30.4                                                                     | 12     | 10.1                        | 21.2                                                       | 4.1    |
| FDUEA           | 20.1                        | 42.5                                                                     | 1.1    | 20.1                        | 48.5                                                       | 13     |
| FDET            | 20.2                        | 72.2                                                                     | 0.19   | 9.9                         | 47.7                                                       | 4.9    |
| N-EtFOSE        | 20.1                        | 22.9                                                                     | 9.2    | 9.9                         | 31.8                                                       | 3.2    |
| FDEA            | 19.9                        | 36.7                                                                     | 5.5    | 20.0                        | 50.7                                                       | 9.7    |
| N-TamP-FHxSA    | 20.0                        | 53.9                                                                     | 10     | 9.9                         | 64.0                                                       | 15     |
| 10:2 FTS        | 19.9                        | 24.1                                                                     | 16     | 10.1                        | 59.0                                                       | 7.0    |
| 6:6 PFPI        | 20.1                        | 26.4                                                                     | 13     | 9.9                         | 36.1                                                       | 22     |
| PFTeA           | 20.1                        | 36.8                                                                     | 2.6    | 10.1                        | 28.4                                                       | 9.6    |
| N-CMAmP-6:2FOSA | 18.4                        | 70.2                                                                     | 4.0    | 10.0                        | 77.8                                                       | 5.6    |

**Table S3. LFB AOF-CIC recoveries (n=3) and precision of organofluorine chemicals using the APU sim and TXA-04 adsorption units. Chemicals listed in order of increasing number of carbons.**

| Chemical        | APU sim Spike concentration µg/L | APU sim Recovery, % | APU sim RSD, % | TXA-04 Spike concentration µg/L | TXA-04 Recovery, % | TXA-04 RSD, % |
|-----------------|----------------------------------|---------------------|----------------|---------------------------------|--------------------|---------------|
| PFBA            | 9.9                              | 64.2                | 5.2            | 9.9                             | 47.0               | 0.068         |
| PF4OPeA         | 10.1                             | 98.0                | 4.3            | 10.1                            | 101                | 2.2           |
| FBSA-I          | 10.0                             | 97.8                | 3.5            | 10.0                            | 94.9               | 10            |
| PFBS            | 9.9                              | 99.3                | 24             | 9.9                             | 116                | 11            |
| PFEESA          | 10.1                             | 90.3                | 2.7            | 10.1                            | 89.5               | 1.0           |
| PFPeA           | 10.0                             | 90.4                | 12             | 10.0                            | 108                | 0.70          |
| PF5OHxA         | 10.1                             | 96.8                | 4.3            | 10.1                            | 110                | 0.72          |
| 3,6-OPFHpA      | 10.1                             | 99.6                | 2.0            | 10.1                            | 110                | 5.3           |
| PFPeS           | 10.1                             | 105                 | 5.9            | 7.0                             | 105                | 7.8           |
| FBET            | 10.0                             | 91.7                | 6.2            | 10.0                            | 94.8               | 3.9           |
| HFPO-DA         | 10.1                             | 98.0                | 4.2            | 10.1                            | 93.8               | 1.9           |
| 4:2 FTS         | 10.0                             | 98.6                | 3.3            | 10.0                            | 105                | 0.45          |
| PFHxS           | 10.0                             | 105                 | 1.0            | 10.0                            | 102                | 2.3           |
| PFHxPA          | 9.9                              | 90.7                | 1.8            | 9.9                             | 91.1               | 11            |
| FHUEA           | 9.9                              | 96.9                | 3.2            | 20.1                            | 102                | 2.2           |
| FHEA            | 10.1                             | 98.4                | 2.2            | 19.9                            | 99.5               | 0.92          |
| PFOA            | 10.3                             | 82.5                | 0.56           | 10.3                            | 78.0               | 5.6           |
| 6:2 PAP         | 10.1                             | 84.0                | 3.3            | 10.1                            | 81.3               | 15            |
| PFOS            | 10.2                             | 98.6                | 4.3            | 10.2                            | 89.3               | 3.3           |
| 9Cl-PF3ONS      | 10.1                             | 88.0                | 5.8            | 10.1                            | 88.8               | 7.2           |
| PFDA            | 9.8                              | 70.7                | 3.0            | 9.8                             | 82.6               | 1.5           |
| FOSAA           | 10.1                             | 83.5                | 1.6            | 10.1                            | 82.6               | 4.2           |
| PFDPA           | 10.0                             | 76.1                | 12             | 10.0                            | 99.1               | 6.8           |
| 11Cl-PF3OUdS    | 10.0                             | 63.7                | 20             | 9.9                             | 46.2               | 21            |
| N-AP-FHxSA      | 9.9                              | 84.0                | 2.0            | 9.9                             | 46.3               | 14            |
| N-MeFOSE        | 10.1                             | 38.0                | 40             | 10.1                            | 21.2               | 4.1           |
| FDUEA           | 9.9                              | 62.7                | 4.5            | 20.1                            | 48.5               | 13            |
| FDET            | 9.9                              | 47.7                | 9.6            | 9.9                             | 47.7               | 4.9           |
| N-EtFOSE-M      | 9.9                              | 41.3                | 7.3            | 9.9                             | 31.8               | 3.2           |
| FDEA            | 10.0                             | 62.6                | 8.9            | 20.0                            | 50.7               | 9.7           |
| N-TamP-FHxSA    | 9.9                              | 78.1                | 4.6            | 9.9                             | 64.0               | 15            |
| 10:2 FTS        | 10.1                             | 69.9                | 2.4            | 10.1                            | 59.0               | 7.0           |
| 6:6 PFPi        | 9.9                              | 76.2                | 2.7            | 9.9                             | 36.1               | 22            |
| Fluconazole     | 12.5                             | 97.8                | 2.6            | 12.5                            | 101                | 3.8           |
| Trifluralin     | 17.0                             | 49.7                | 5.9            | 17.0                            | 49.6               | 2.7           |
| PFTeDA          | 10.1                             | 45.4                | 1.9            | 10.1                            | 28.4               | 9.6           |
| N-CMAmP-6:2FOSA | 10.0                             | 77.4                | 3.1            | 10.0                            | 77.8               | 5.6           |
| oxyfluorfen     | 15.6                             | 50.9                | 7.8            | 15.6                            | 47.1               | 14            |
| atorvastatin    | 10.1                             | 87.2                | 2.9            | 10.1                            | 87.4               | 2.3           |
